# Supplementary figures and images for: Preventing First Hospitalization for Psychosis: In Reply
Source: Atypon-hosted journal article supplement (doi:10.1176/appi.ps.661007), 2015-10-01

Figure 1. Disposition of contacts, 5/7/2001-9/1/2007<sup>1</sup>

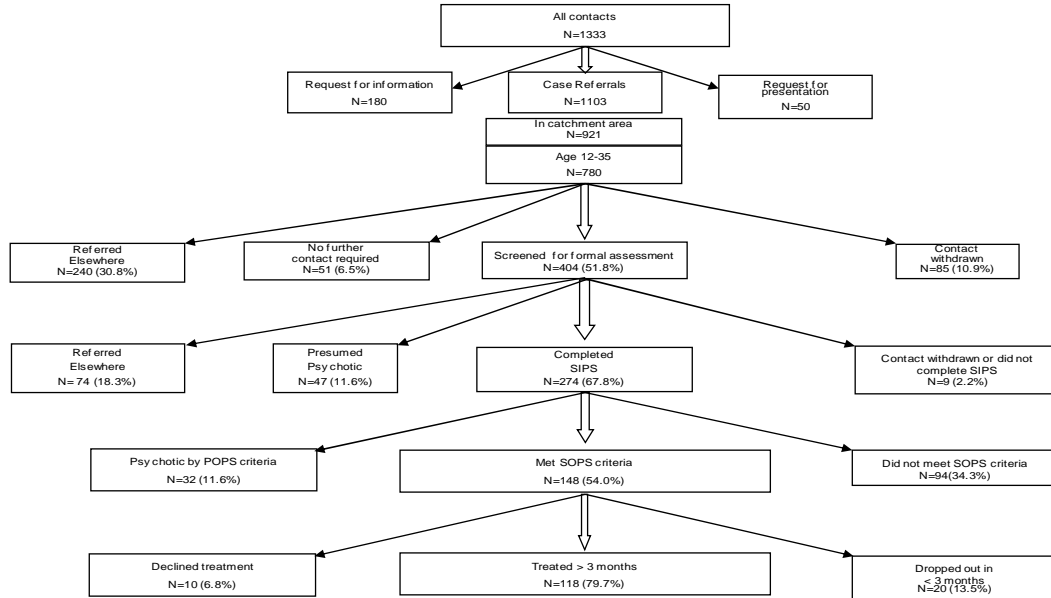

Supplement: appi.ps.661007.ds001.pdf [file appi.ps.661007.ds001.pdf]
